# Supplementary material
Source: PubMed Central journal article supplement (PMC7073301)
Supplement: NIHMS1546971-supplement-3.pdf [file NIHMS1546971-supplement-3.pdf]

A

|                                        | TA    | TSA   | SSL     | HP    |
|----------------------------------------|-------|-------|---------|-------|
| <b>AGRN</b><br>(basal lamina)          | 64/64 | 25/25 | 189/189 | 71/71 |
| <b>TIMP1</b><br>(cytoplasm)            | 31/31 | 7/7   | 7/7     | 5/5   |
| <b>SERPINE2</b><br>(cytoplasm and ECM) | 9/12  | 6/7   | 3/4     | 2/3   |

B

## Gender and age distribution

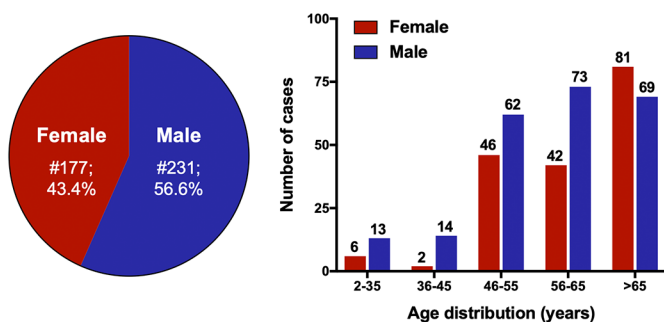

C

## Site of origin

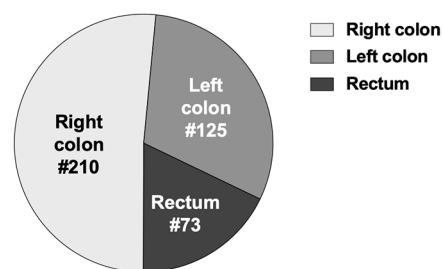

D

## Sample type

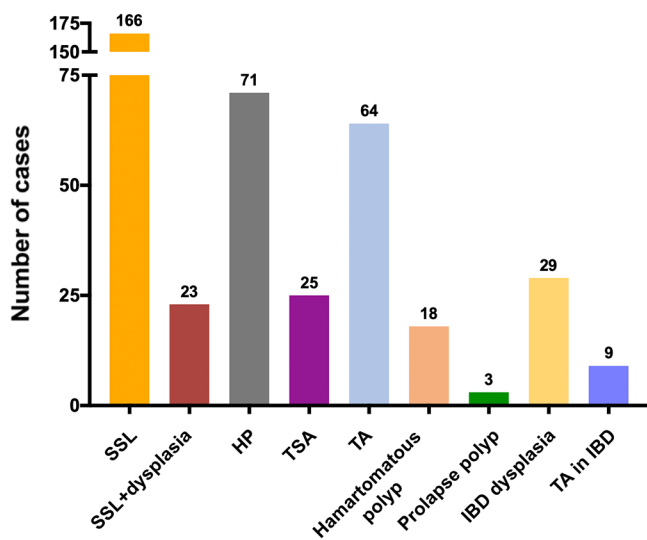

E

## Site of origin vs sample type

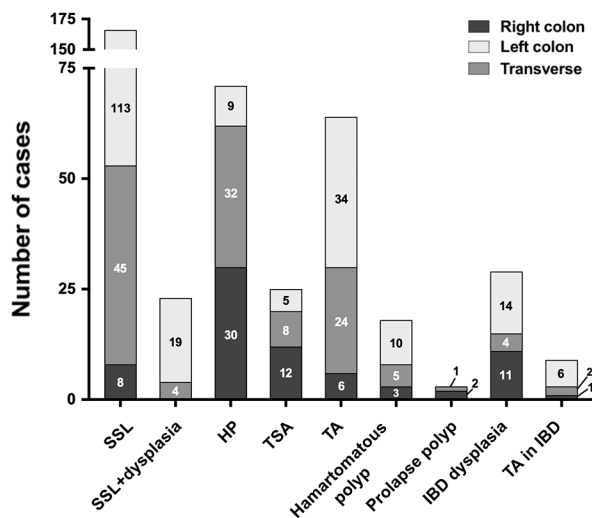

Figure S2
