# Supplementary material
Source: PubMed Central journal article supplement (PMC7073301)
Supplement: NIHMS1546971-supplement-8.pdf [file NIHMS1546971-supplement-8.pdf]

A

| Sample type | SSL +/- dysplasia | HP | TA | TSA | Hamartomatous polyp | IBD dysplasia | TA in IBD |
|-------------|-------------------|----|----|-----|---------------------|---------------|-----------|
| #           | 38                | 29 | 10 | 5   | 10                  | 4             | 4         |

B

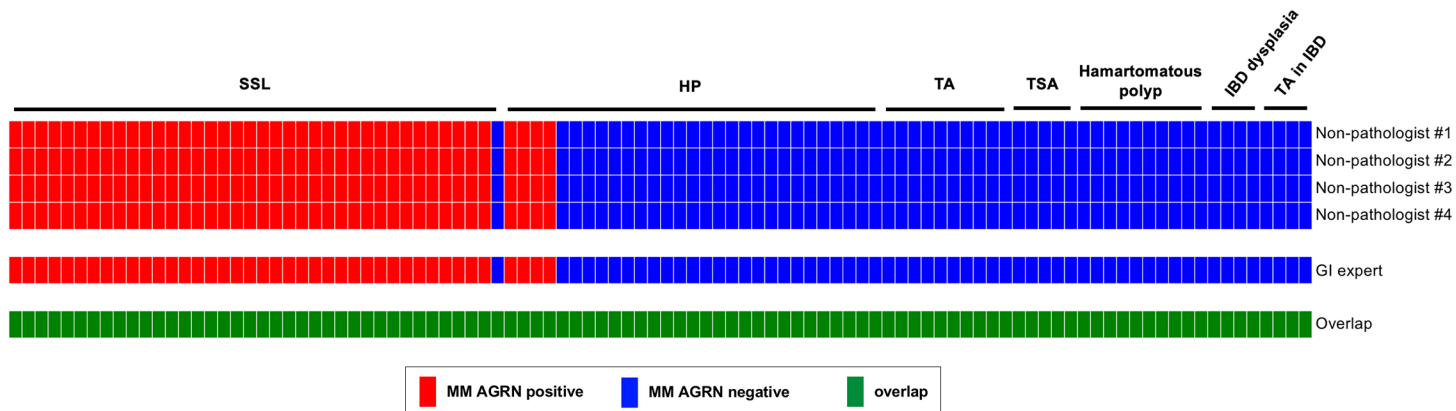

C

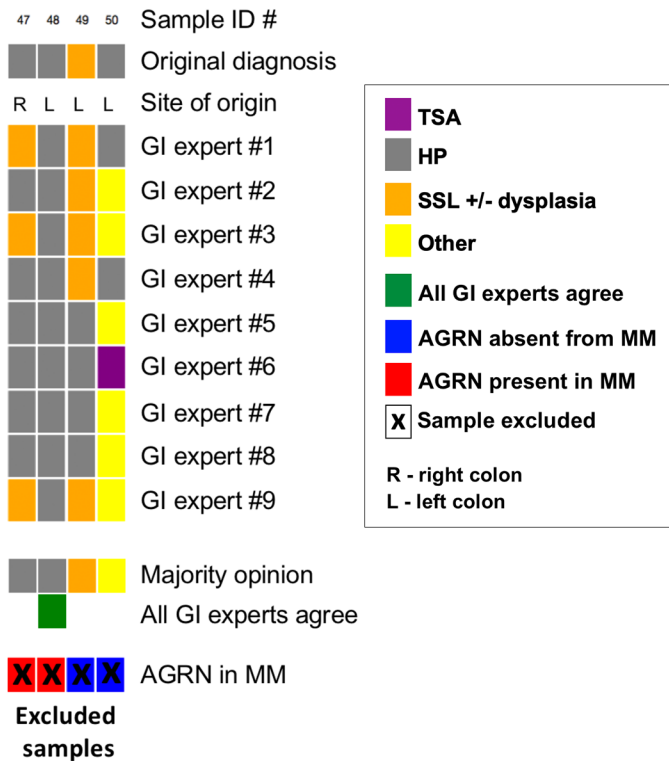

D

| #366 samples used for calculation  | SSL +/- dysplasia | HP   | TA   | TSA  | Hamartomatous + Prolapse polyps |
|------------------------------------|-------------------|------|------|------|---------------------------------|
| AGRN positive in muscularis mucosa | 186/188           | 5/68 | 0/64 | 0/25 | 0/21                            |

|             |       |
|-------------|-------|
| Sensitivity | 98.9% |
| Specificity | 97.1% |

Figure S7
