# Supplementary material
Source: PubMed Central journal article supplement (PMC7073301)

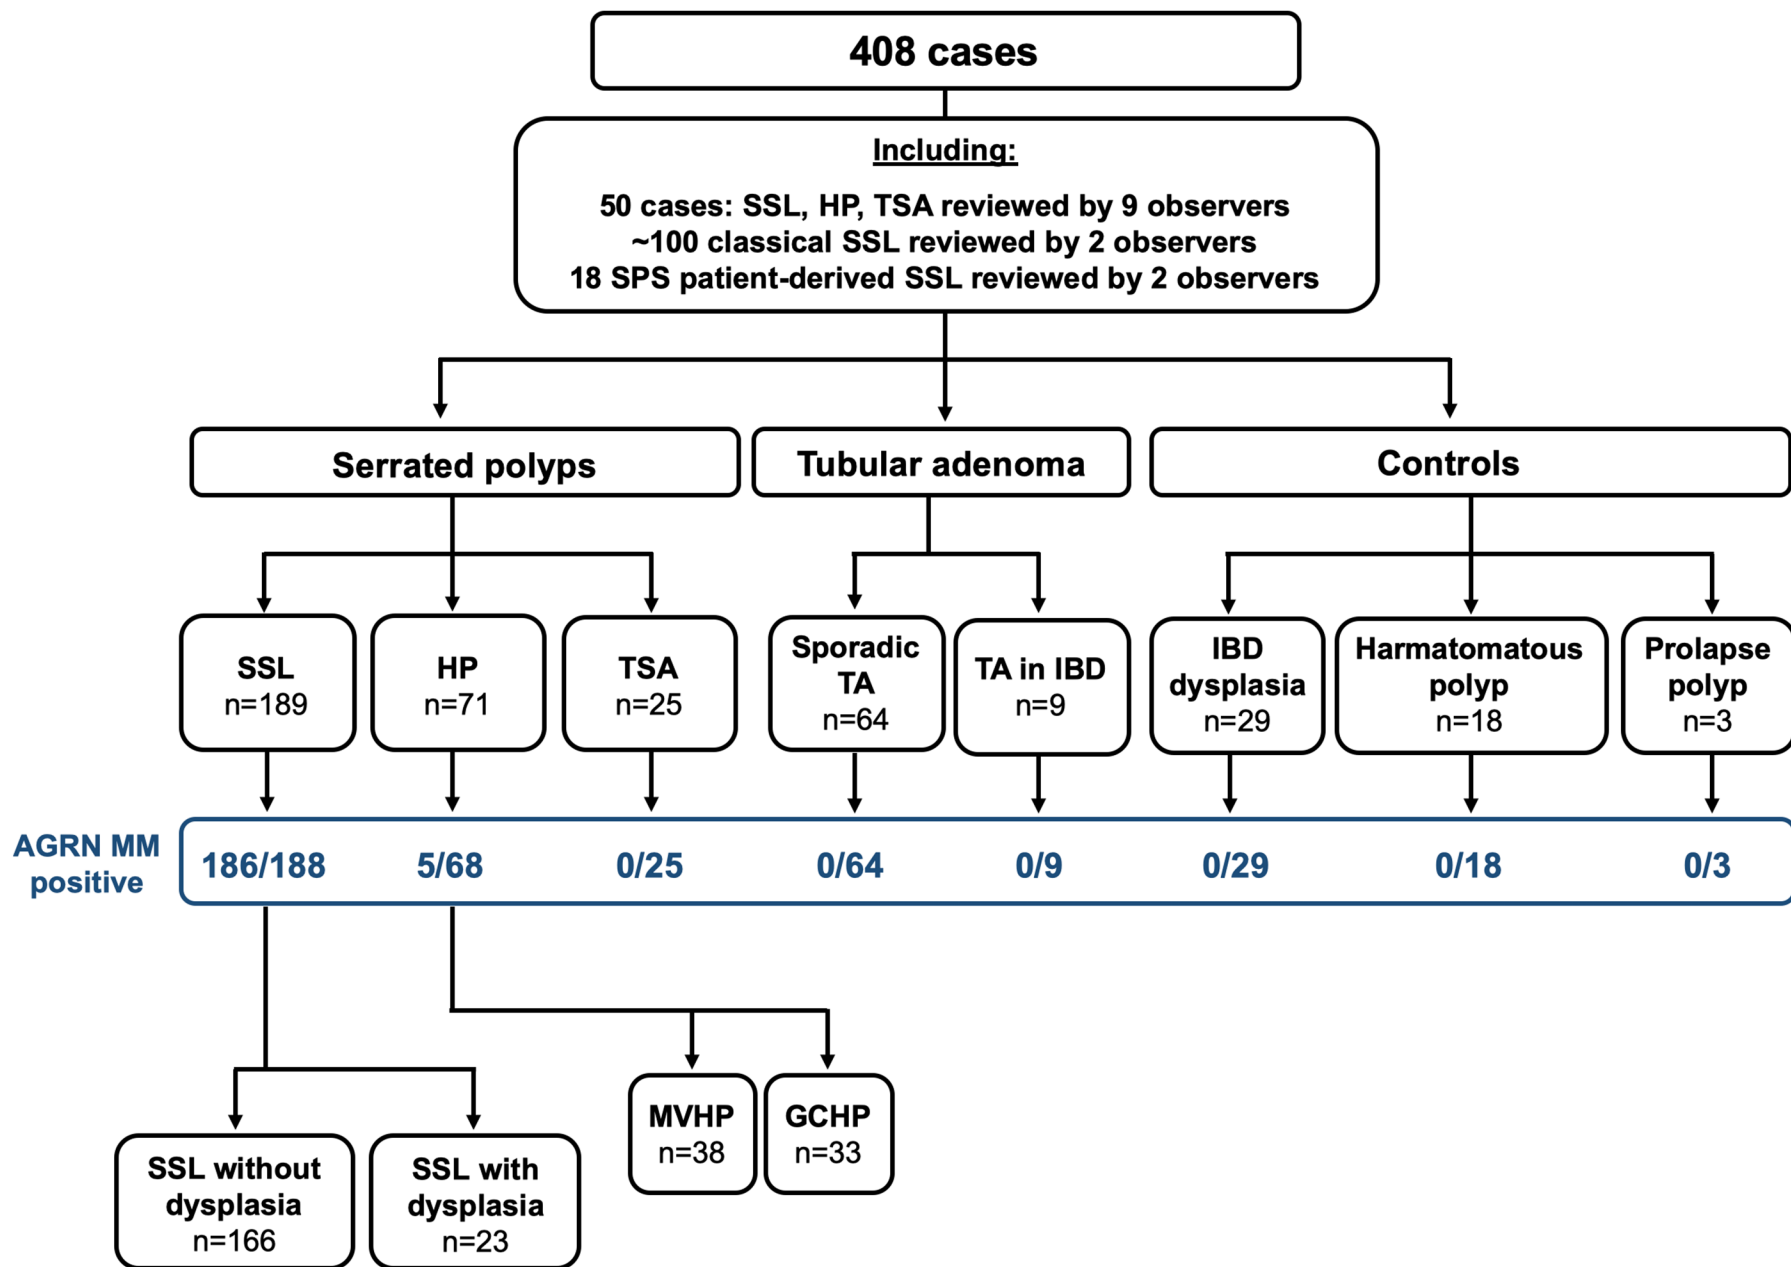

Figure S9

Supplement: NIHMS1546971-supplement-10.pdf [file NIHMS1546971-supplement-10.pdf]

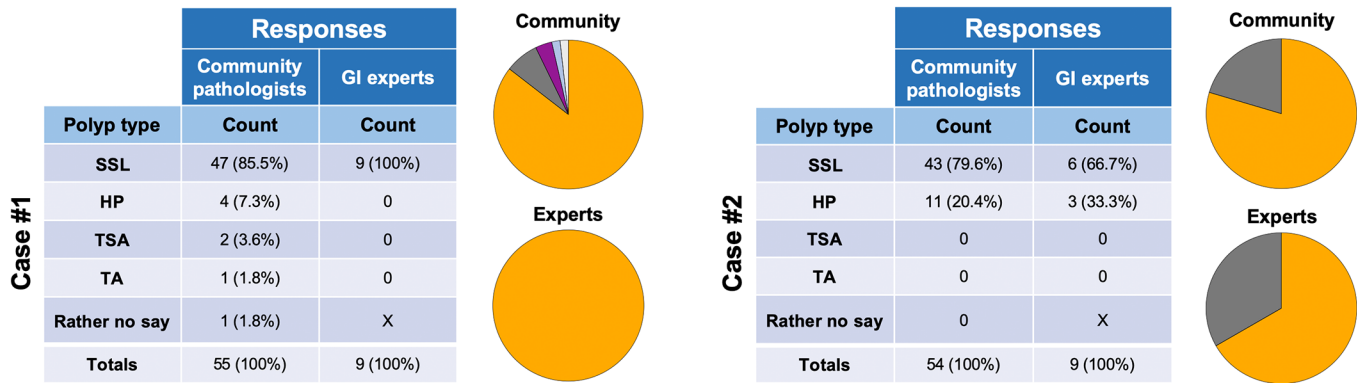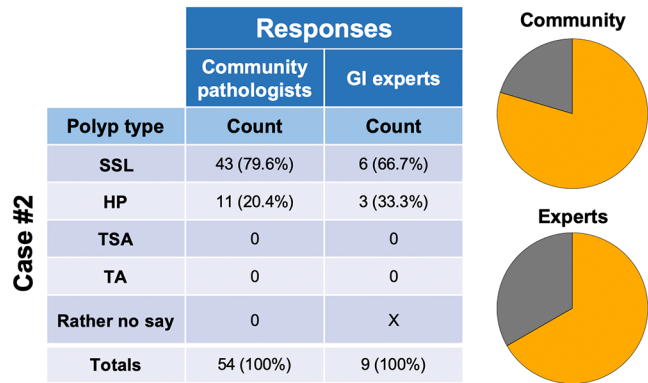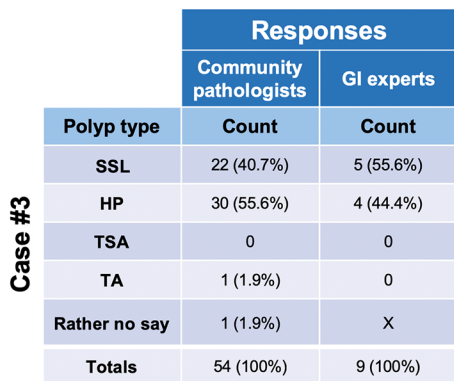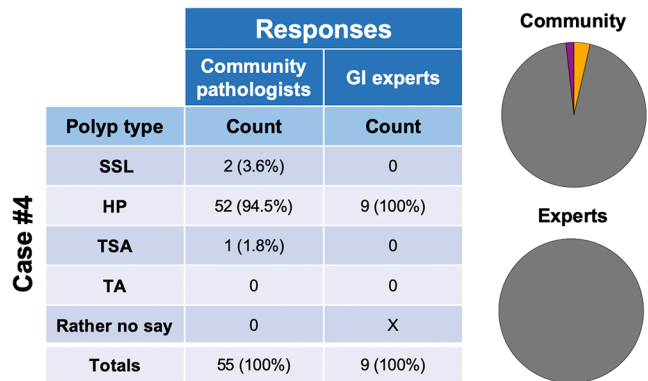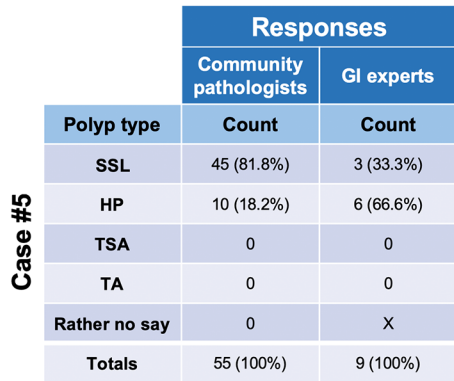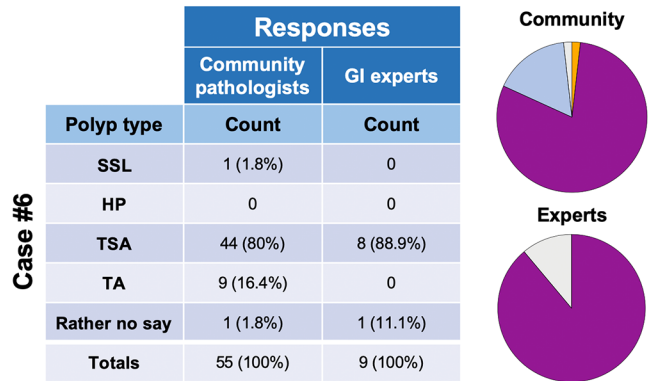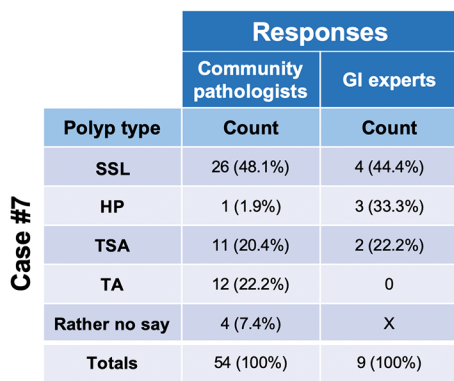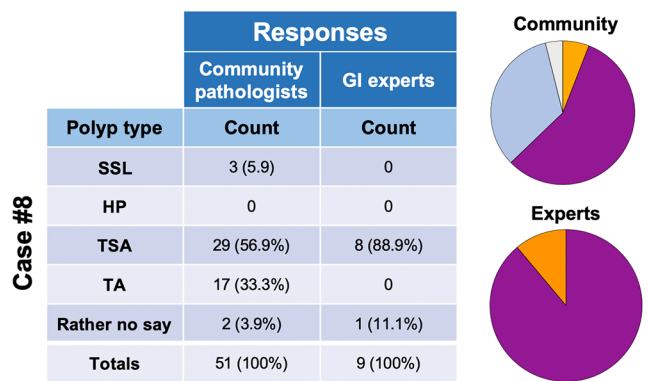

■ SSL   
 ■ HP   
 ■ TSA   
 ■ TA   
 ■ Other

Figure S10

Supplement: NIHMS1546971-supplement-11.pdf [file NIHMS1546971-supplement-11.pdf]

# Individual samples (Kanth et al. 2016)

- Max (5.44)
- Average (0.00)
- Min (-3.73)

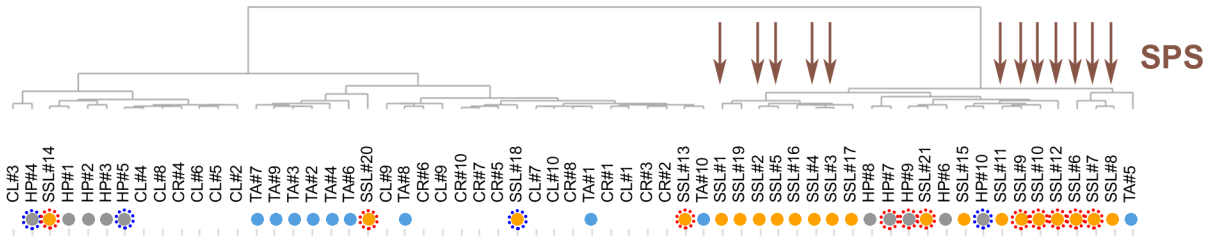

## ECM gene set (Naba et al. 2014)

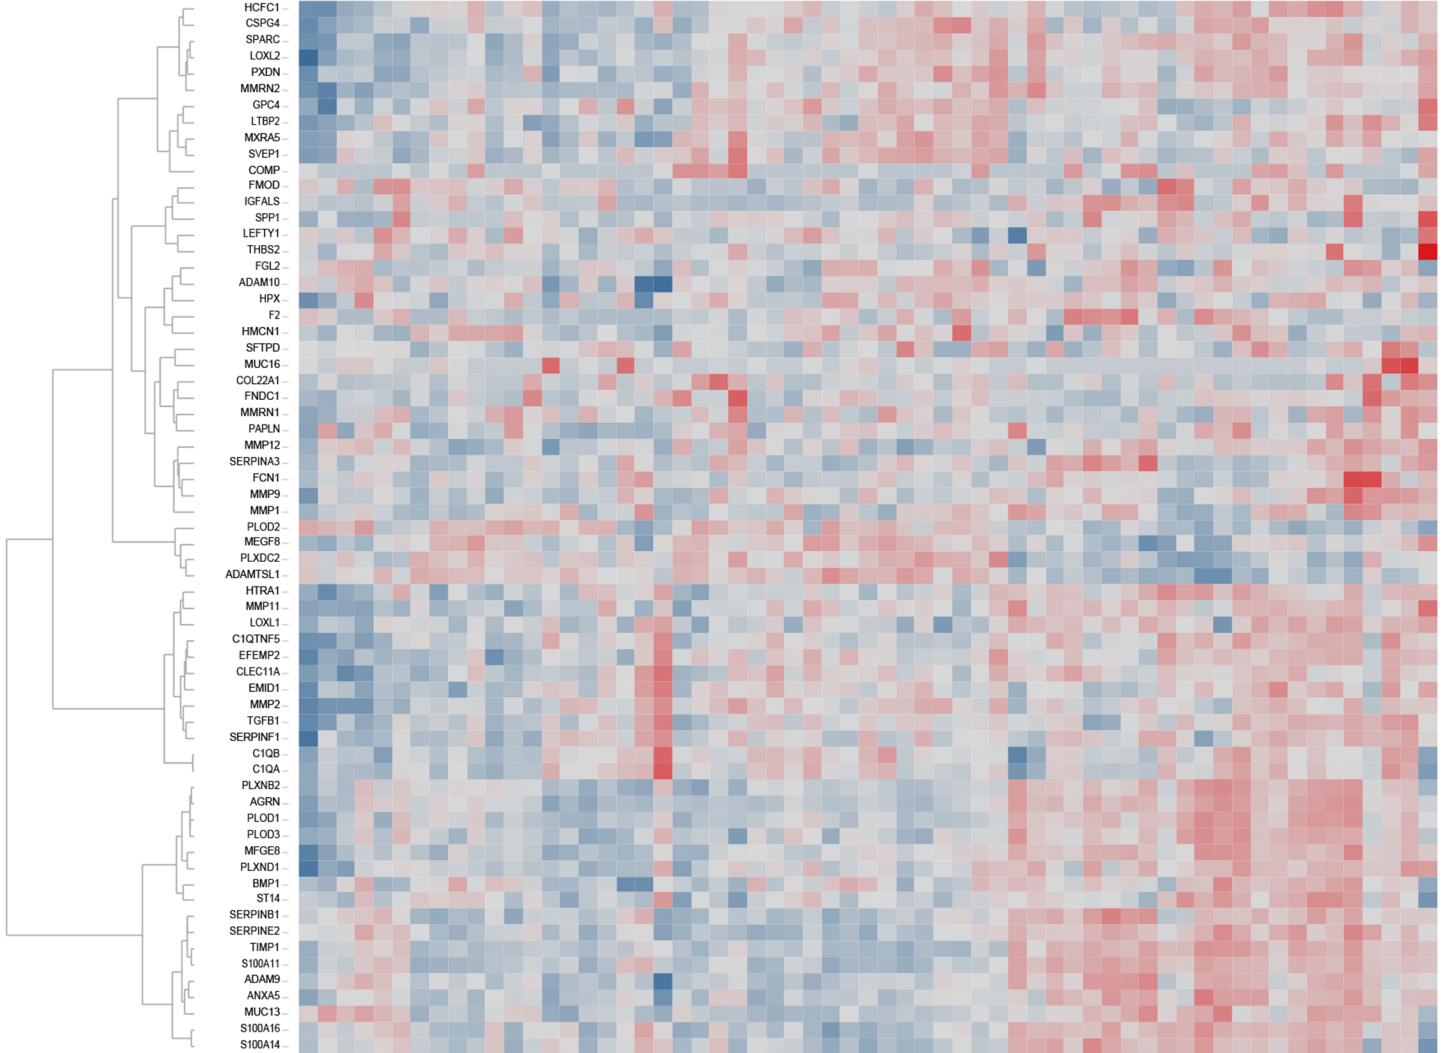

Figure S1

Supplement: NIHMS1546971-supplement-2.pdf [file NIHMS1546971-supplement-2.pdf]

**H&E****AGRN****TIMP1****SERPINE2****TA**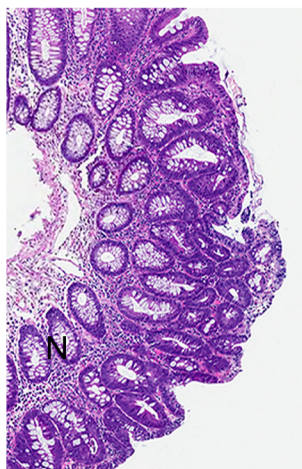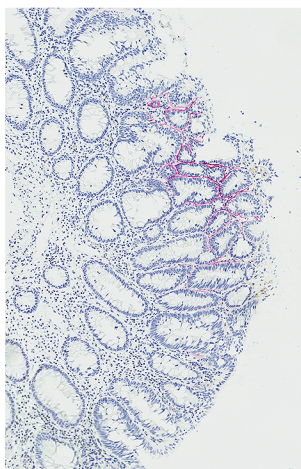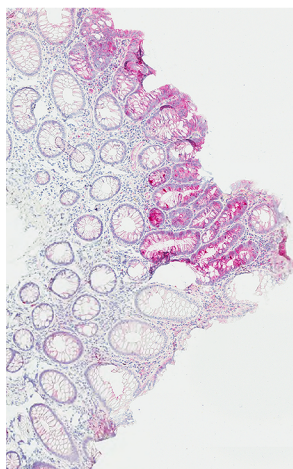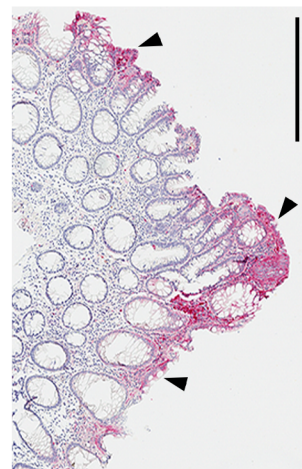**TSA**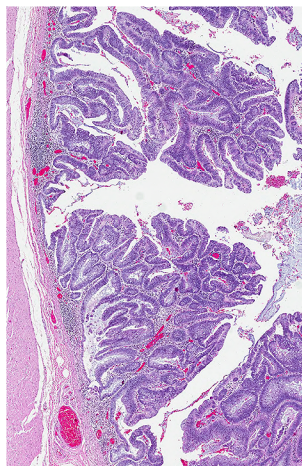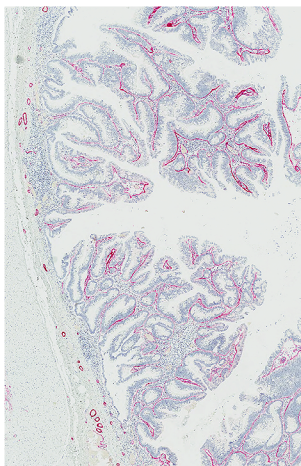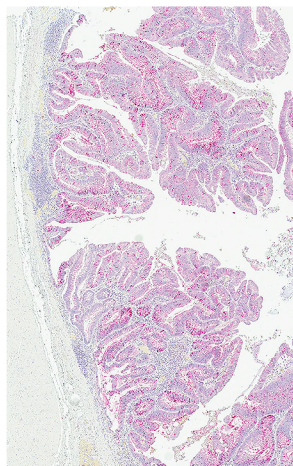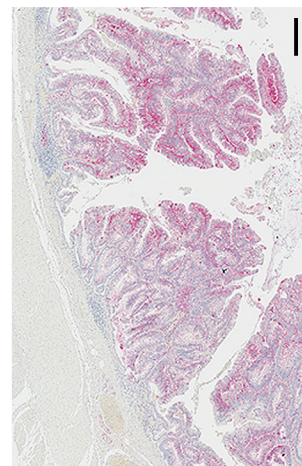**SSL**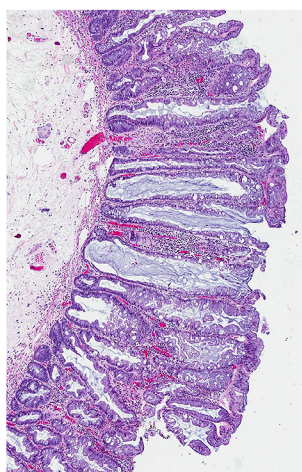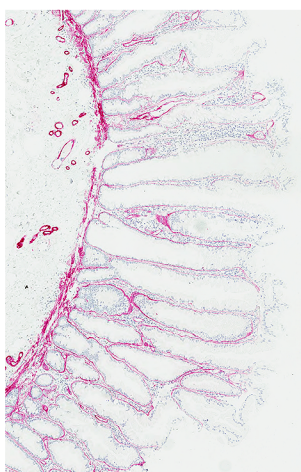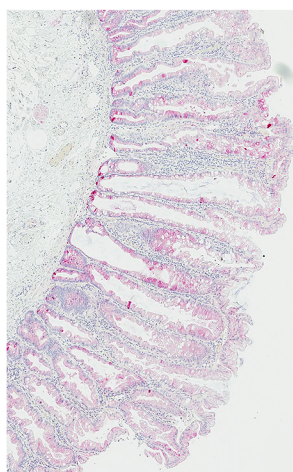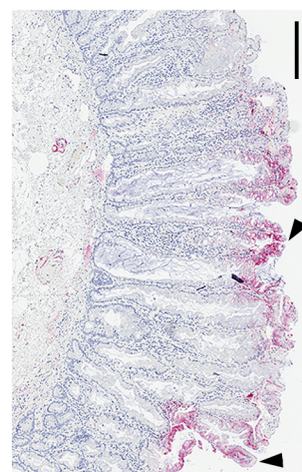**HP**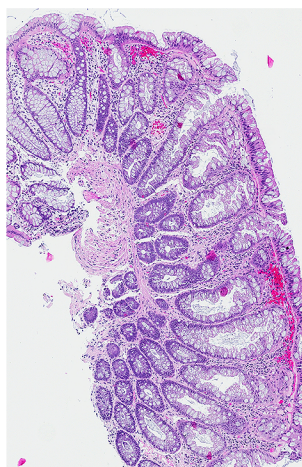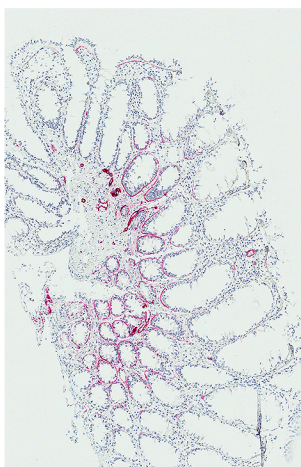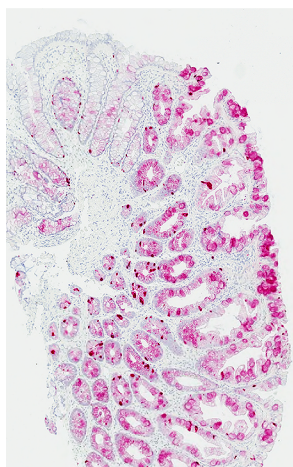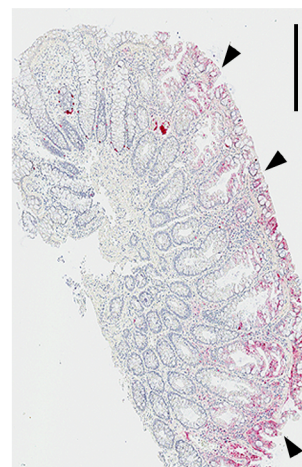**Figure S3**

Supplement: NIHMS1546971-supplement-4.pdf [file NIHMS1546971-supplement-4.pdf]

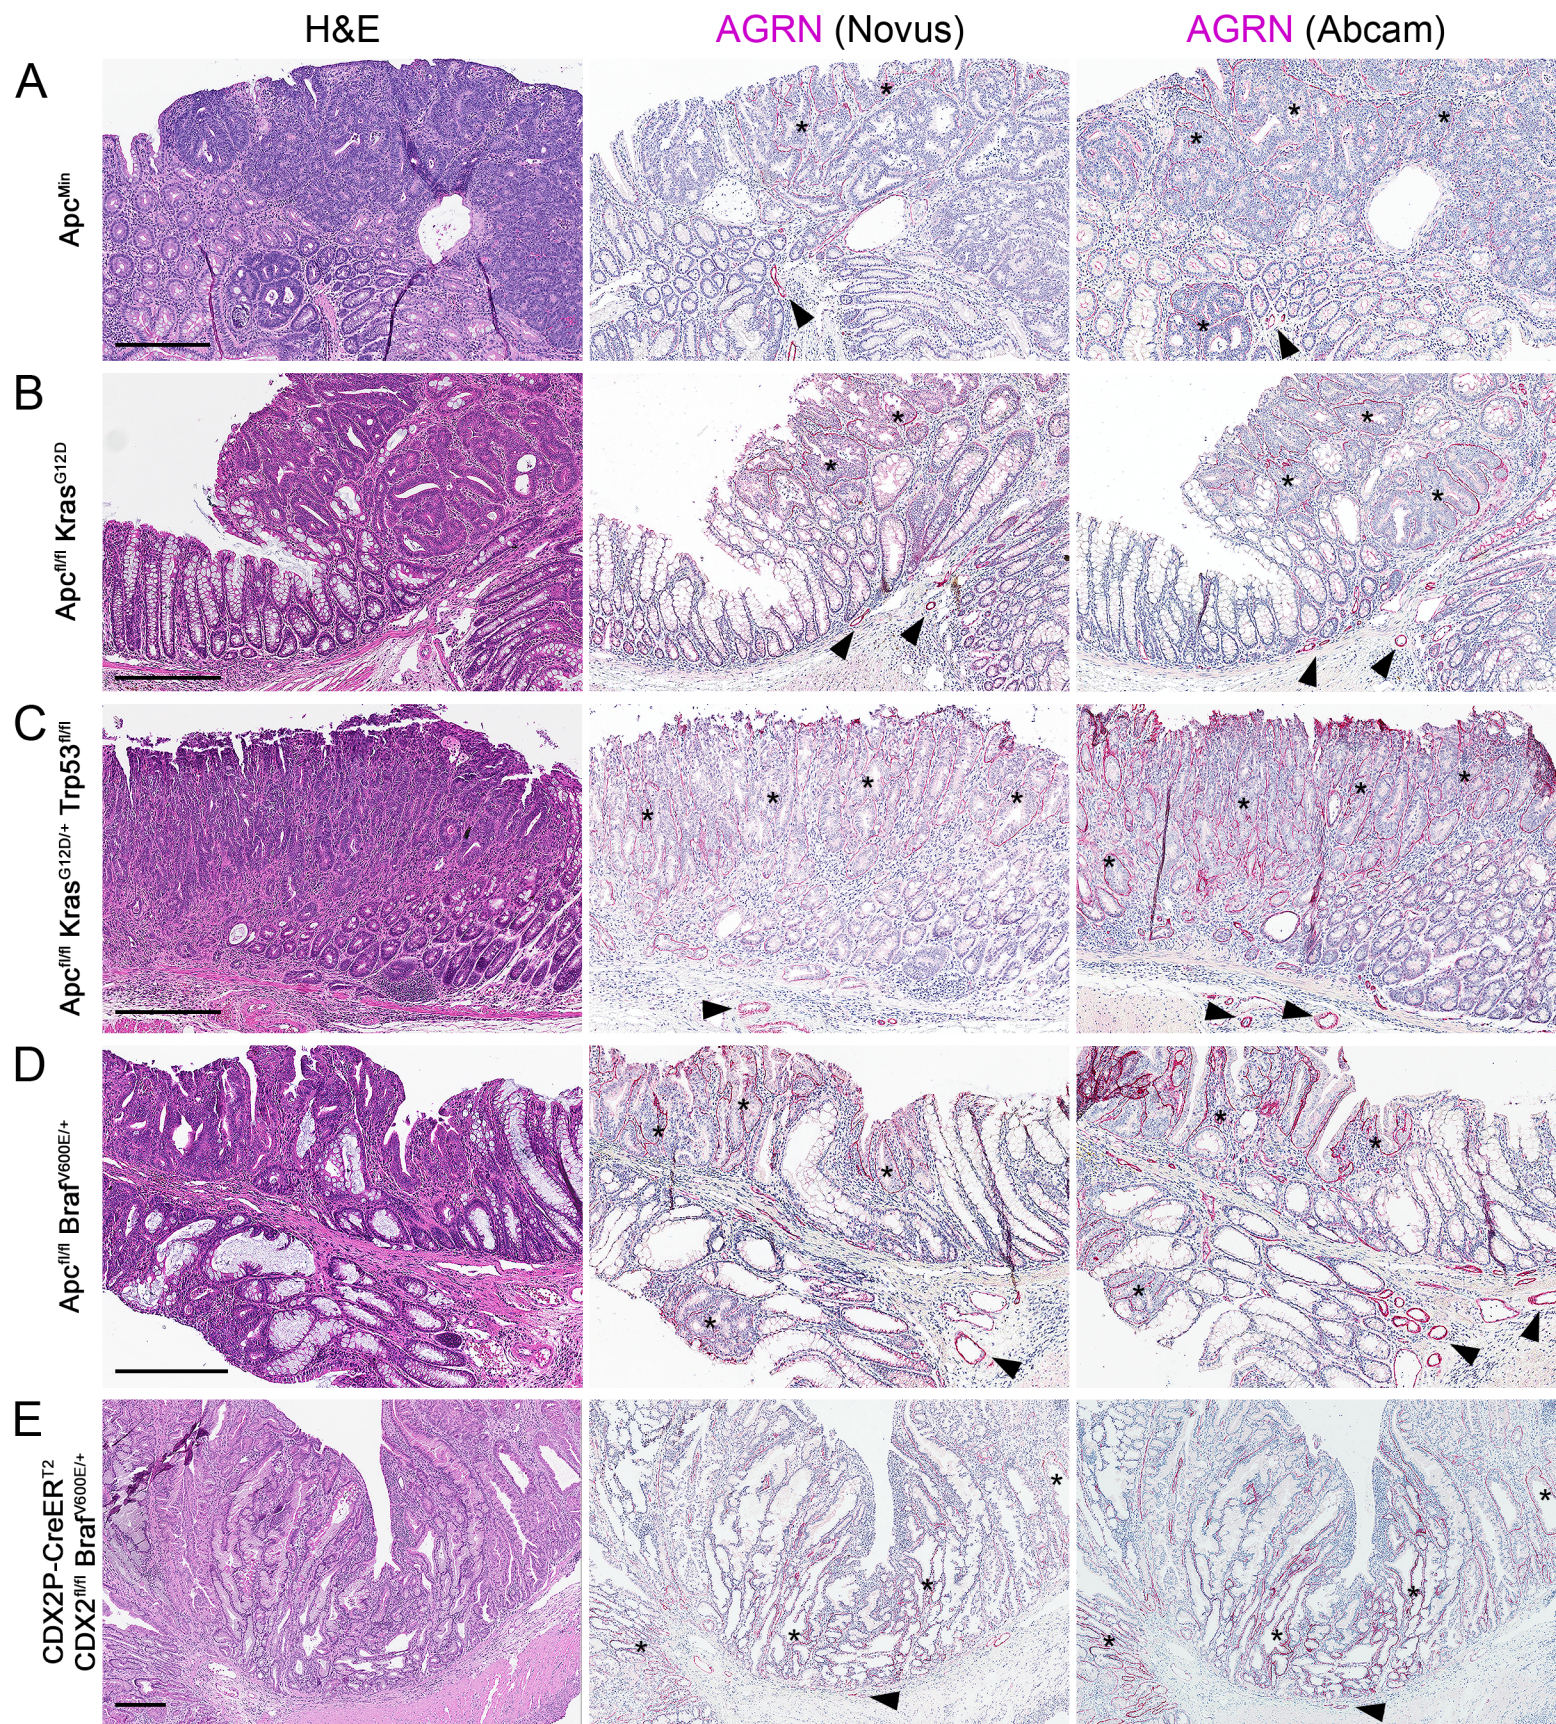

**Figure S4**

Supplement: NIHMS1546971-supplement-5.pdf [file NIHMS1546971-supplement-5.pdf]

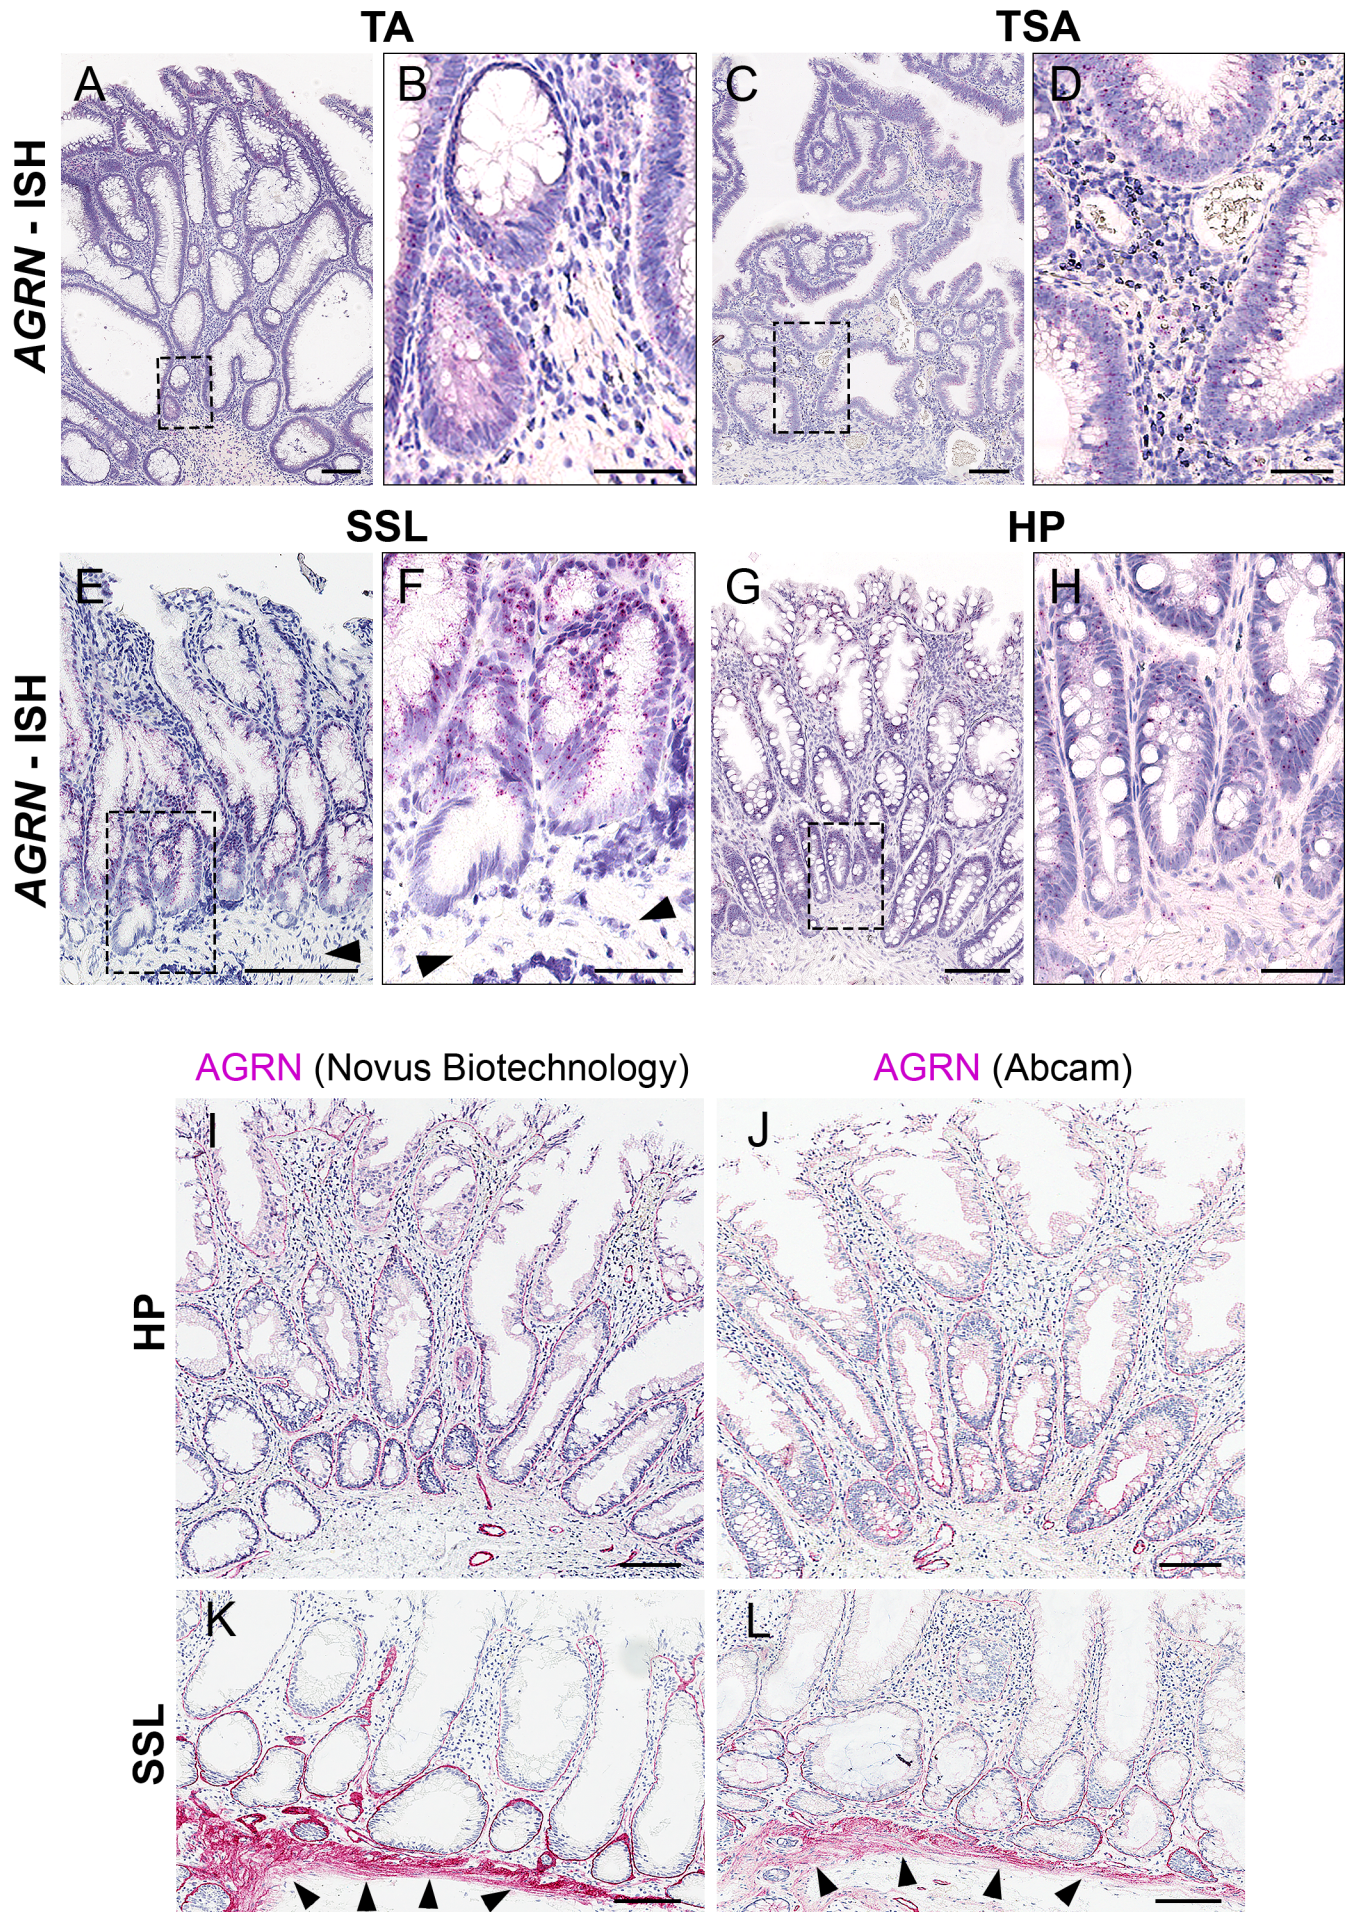

Figure S5

Supplement: NIHMS1546971-supplement-6.pdf [file NIHMS1546971-supplement-6.pdf]

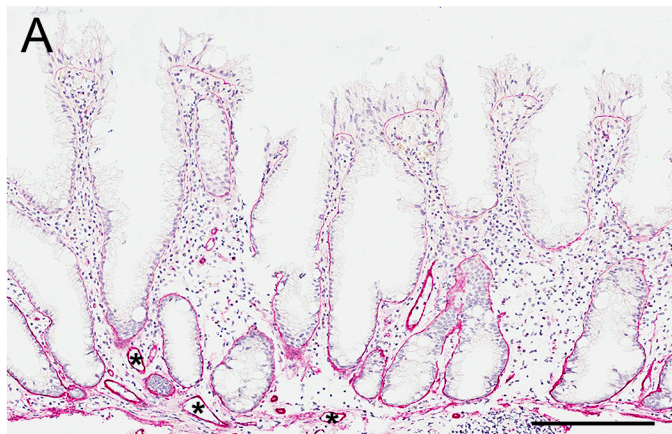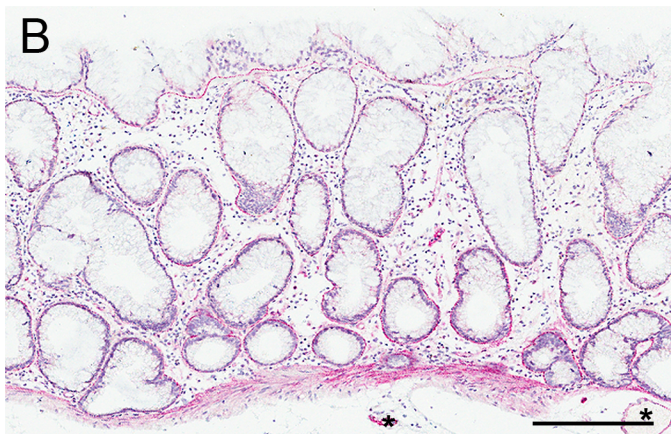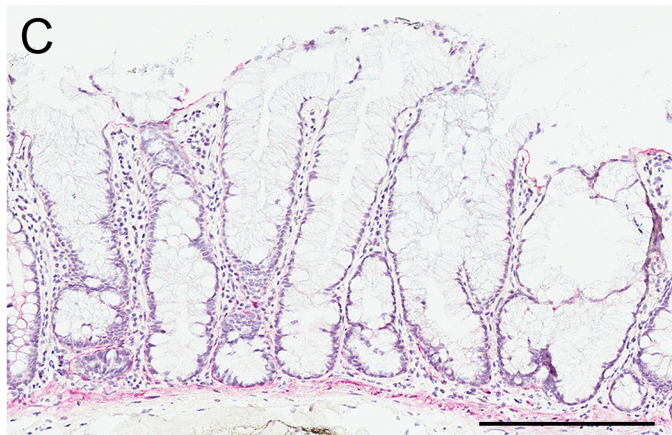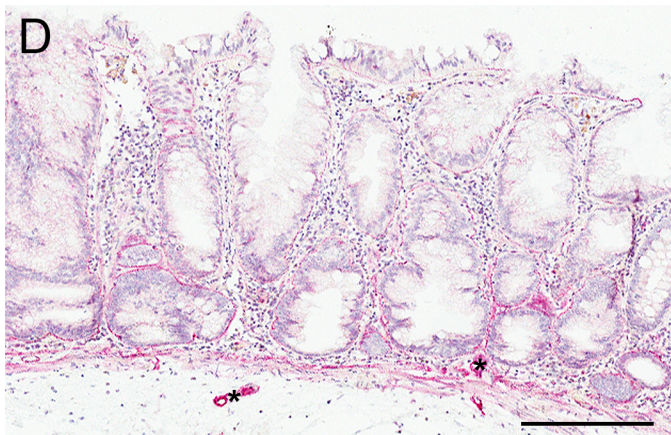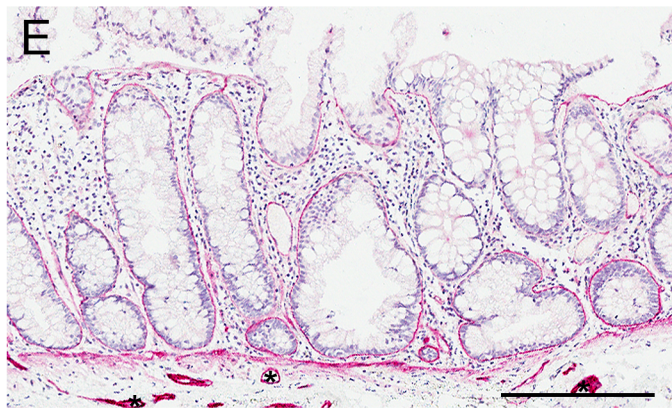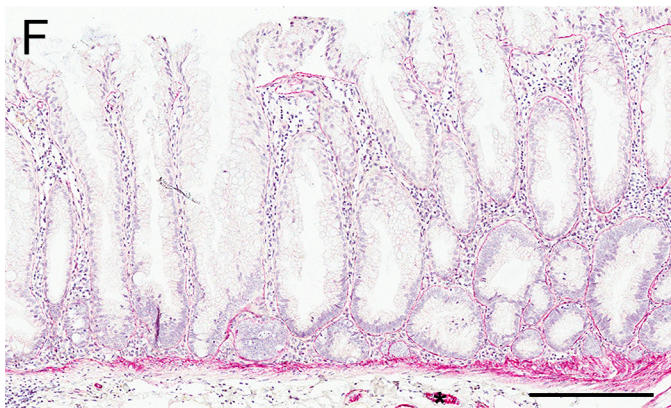

**Figure S6**

Supplement: NIHMS1546971-supplement-7.pdf [file NIHMS1546971-supplement-7.pdf]

H&E

AGRN

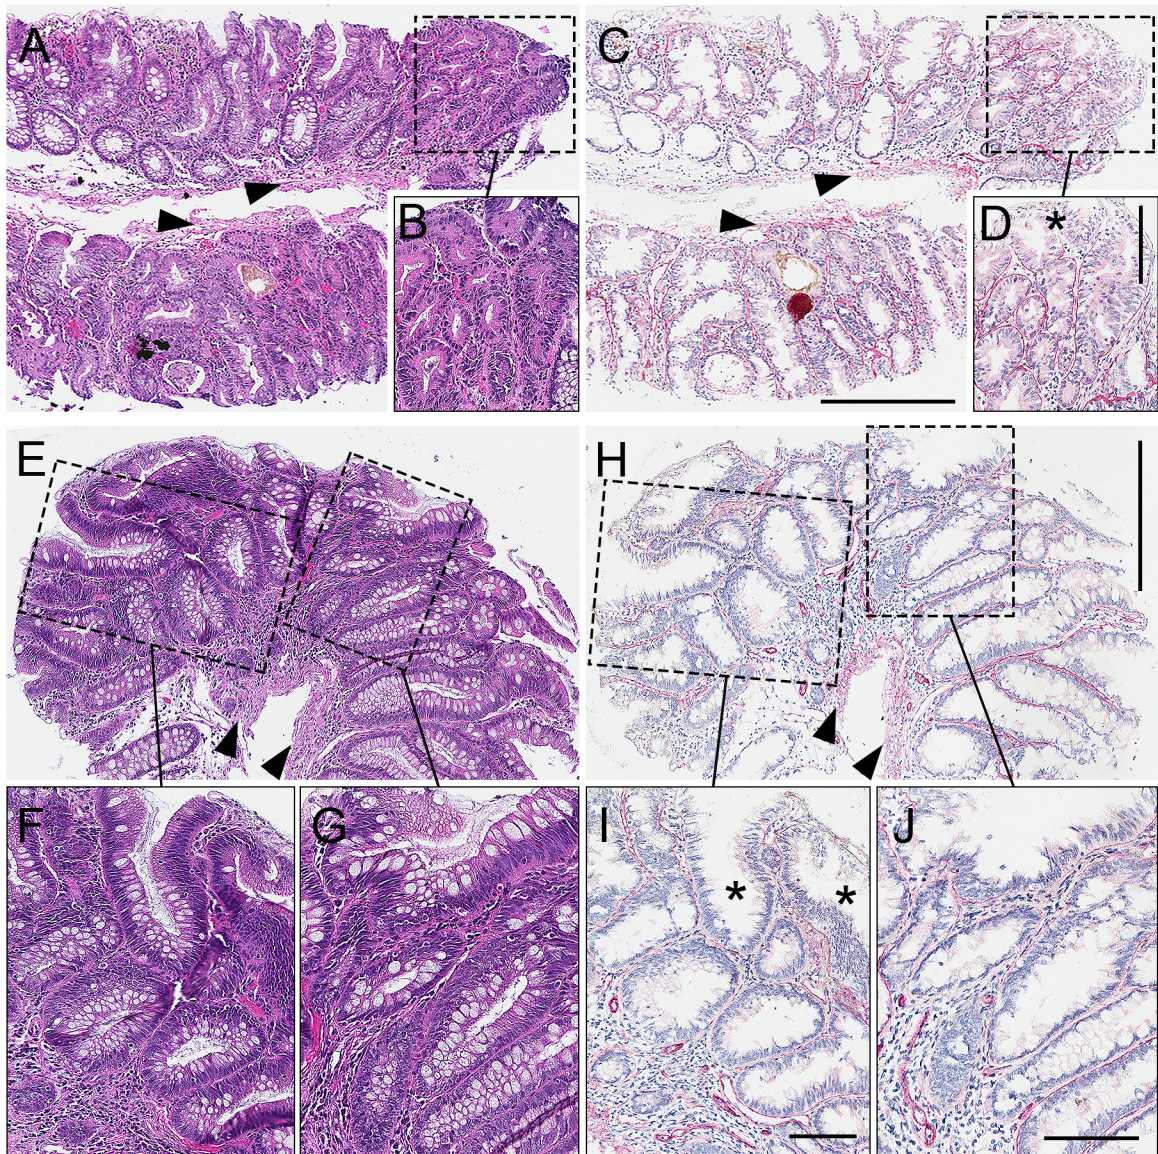

Figure S8

Supplement: NIHMS1546971-supplement-9.pdf [file NIHMS1546971-supplement-9.pdf]
